# Supplementary material
Source: ML conference proceedings conference paper supplement (https://openreview.net/forum?id=BKZCKwIjcl5)
Supplement: supplementary_material [file attachment]

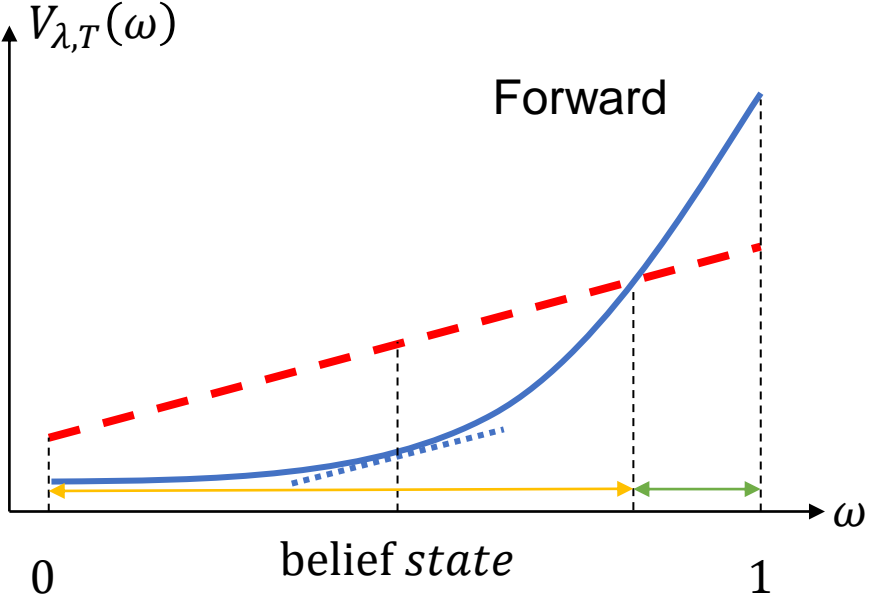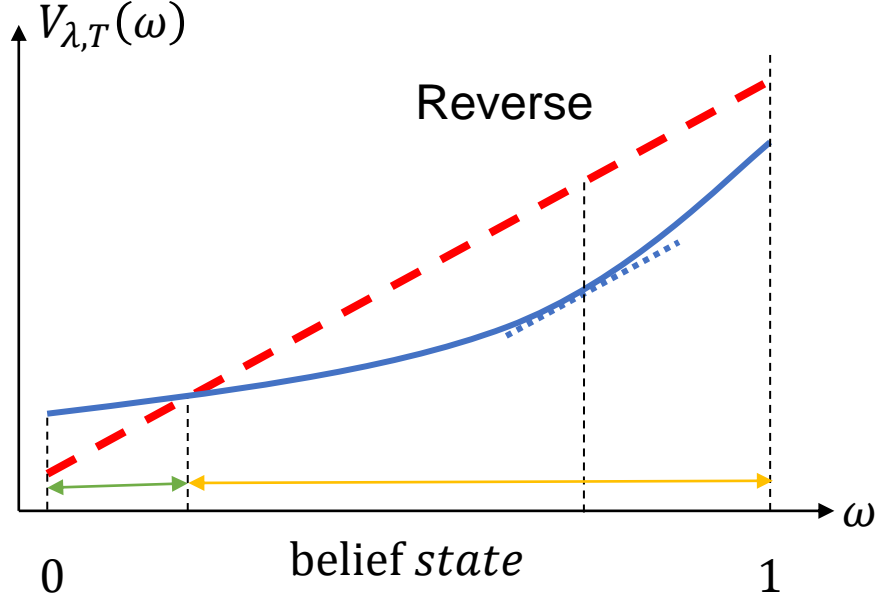

$V_{\lambda,T}(\omega, a = 0)$  ———

$V_{\lambda,T}(\omega, a = 1)$  - - -

Active Set  $\longleftrightarrow$

Passive Set  $\longleftrightarrow$
