# Supplementary material
Source: ML conference proceedings conference paper supplement (https://openreview.net/forum?id=BKZCKwIjcl5)
Supplement: supplementary_material [file attachment]

length of  $L$

$a_1$

...

$a_{L-2}$

$a_{L-1}$

$a_L$

$a_{L-1} \setminus \{a^j\} \cup \{a^i\}$

$a_L \setminus \{a^i\} \cup \{a^l\}$

$a_1$

...

$a_{L-2}$
